# Supplementary material for: Structures, solvatochromism, protonation and photoswitching of tetra-(ortho)substituted azobenzenes bearing 3,5-dimethoxy groups
Source: Royal Society of Chemistry journal article supplement (doi:10.1039/d1nj05699a), 2022-01-01
Supplement: d1nj05699a1.pdf [file d1nj05699a1.pdf]

## Structures, solvatochromism, protonation and photoswitching of tetra-(*ortho*)-substituted azobenzenes bearing 3,5-dimethoxy groups

Sandra Ramírez-Rave, Marcos Flores Alamo and Anatoly K. Yatsimirsky  
Facultad de Química, Universidad Nacional Autónoma de México, 04510 CDMX, México

### Electronic supplementary information

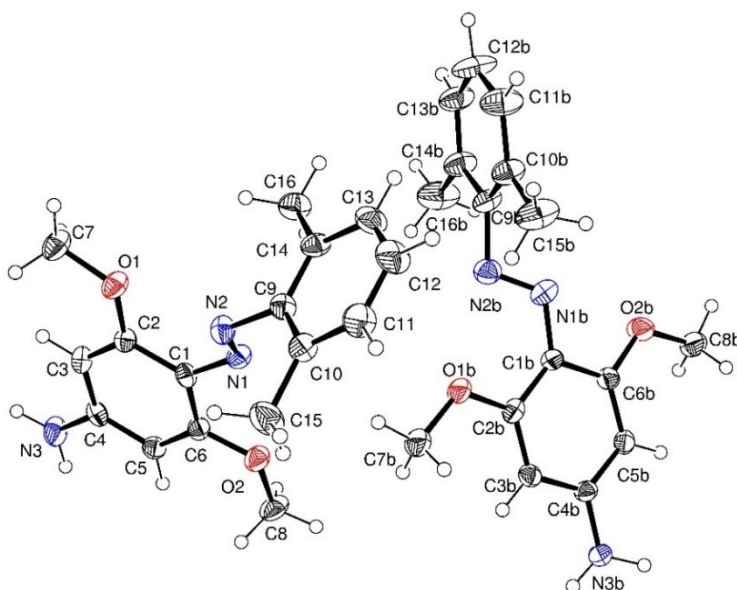

**Fig. S1.** ORTEP drawing of the structure of compound **1**. Non-H atoms are represented by 50% probability ellipsoids and H atoms are shown as small circles of an arbitrary size.

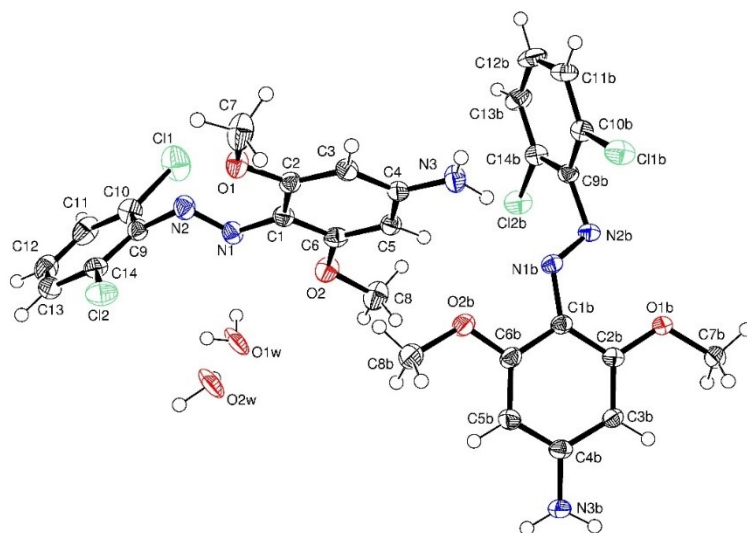

**Fig. S2.** ORTEP drawing of the structure of compound **2**. Non-H atoms are represented by 50% probability ellipsoids and H atoms are shown as small circles of an arbitrary size. The atoms O1w and O2w are disordered over two sites with occupancies 0.50:0.50.

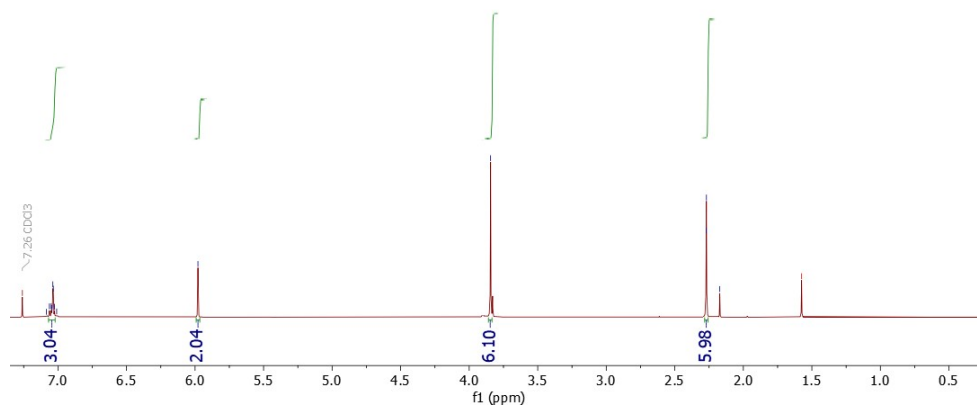

**Fig. S3.**  $^1\text{H}$  NMR spectrum of **1** in  $\text{CDCl}_3$ .

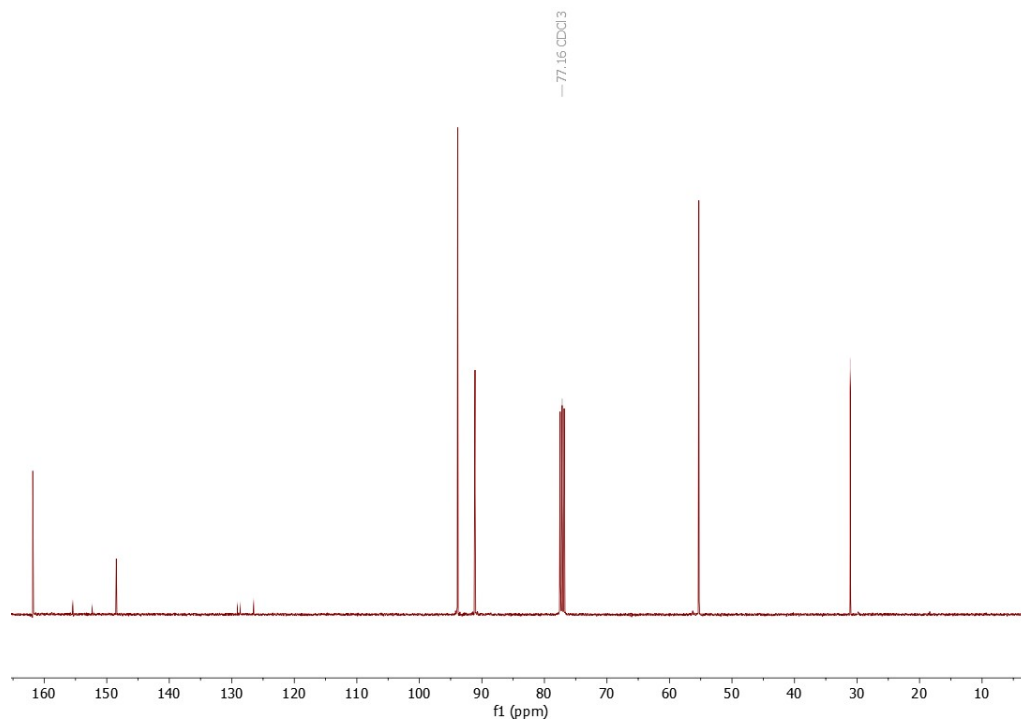

**Fig. S4.**  $^{13}\text{C}$  NMR spectrum of **1** in  $\text{CDCl}_3$ .

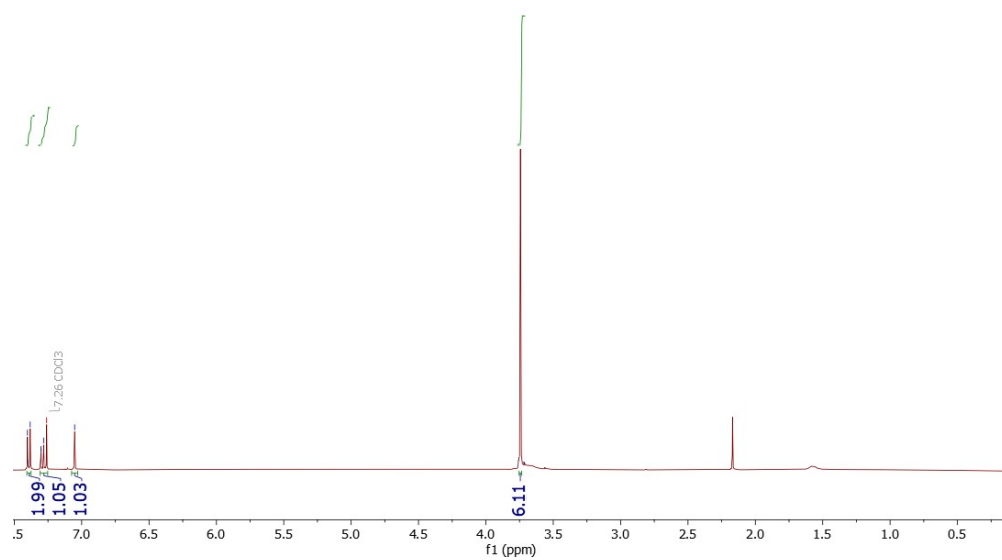

**Fig. S5.**  $^1\text{H}$  NMR spectrum of **2** in  $\text{CDCl}_3$ .

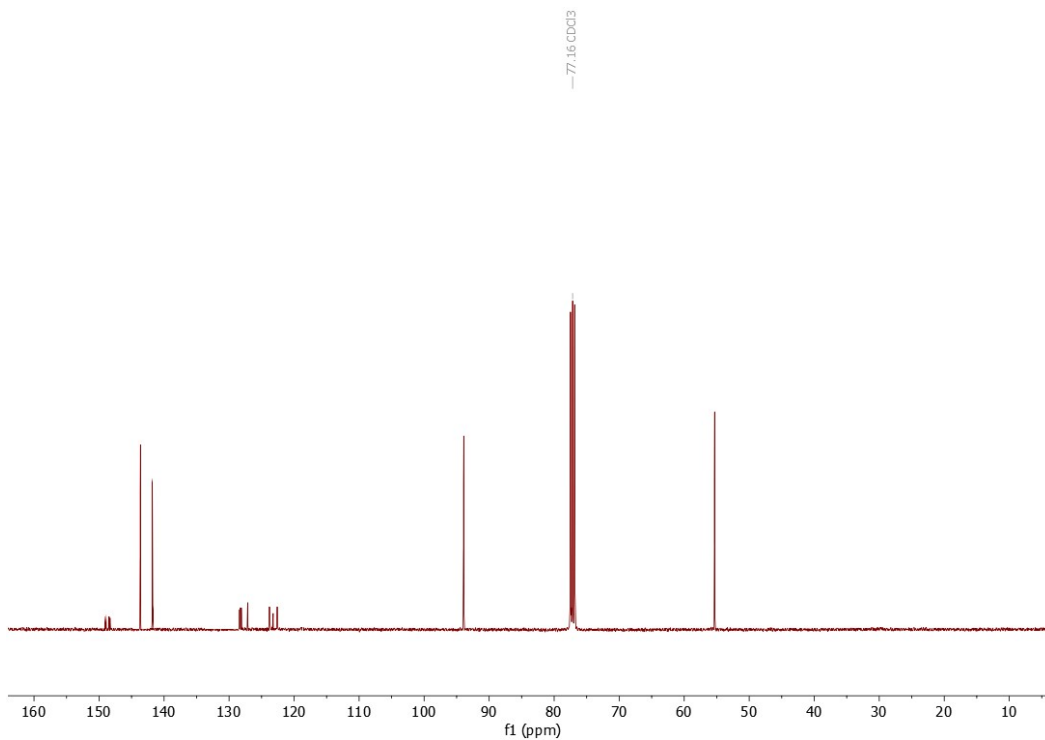

**Fig. S6.**  $^{13}\text{C}$  NMR spectrum of **2** in  $\text{CDCl}_3$ .

**Table S1.** Statistical data for multiparameter linear fit of the results of Table 2 to equations (1) – (3).

| Comp.    | Eq. | Band                        | Coefficient | Value    | Standard Error | t-Value   | Prob> t    |
|----------|-----|-----------------------------|-------------|----------|----------------|-----------|------------|
| <b>1</b> | (1) | $\tilde{\nu}_{\text{max1}}$ | s           | -307.03  | 145.18         | -2.11     | 0.05433    |
|          |     |                             | a           | -39.73   | 99.70          | -0.40     | 0.69673    |
|          |     |                             | b           | -1378.54 | 142.08         | -9.70     | 2.55075E-7 |
| <b>2</b> | (1) | $\tilde{\nu}_{\text{max1}}$ | s           | -775.55  | 110.11         | -7.04341  | 8.75601E-6 |
|          |     |                             | a           | -461.53  | 75.62          | -6.10349  | 3.75914E-5 |
|          |     |                             | b           | -1373.89 | 107.76         | -12.74981 | 1.00681E-8 |
| <b>1</b> | (1) | $\tilde{\nu}_{\text{max2}}$ | s           | 154.95   | 110.70         | 1.39971   | 0.18501    |
|          |     |                             | a           | 993.67   | 76.02          | 13.07052  | 7.45016E-9 |
|          |     |                             | b           | -282.30  | 108.34         | -2.60572  | 0.02177    |
| <b>2</b> | (1) | $\tilde{\nu}_{\text{max2}}$ | s           | -929.59  | 257.58         | -3.60898  | 0.00318    |
|          |     |                             | a           | 180.66   | 176.89         | 1.02136   | 0.32571    |
|          |     |                             | b           | -759.89  | 252.07         | -3.01458  | 0.00996    |
| <b>1</b> | (2) | $\tilde{\nu}_{\text{max1}}$ | s           | -1296.51 | 738.88         | -1.7547   | 0.10478    |
|          |     |                             | d           | -185.97  | 230.00         | -0.80855  | 0.43451    |
|          |     |                             | a           | -522.55  | 212.38         | -2.46049  | 0.03001    |
|          |     |                             | b           | -1517.84 | 224.14         | -6.77197  | 1.98063E-5 |
| <b>2</b> | (2) | $\tilde{\nu}_{\text{max1}}$ | s           | -1634.22 | 552.19         | -2.9595   | 0.01193    |
|          |     |                             | d           | -625.32  | 171.89         | -3.63792  | 0.0034     |
|          |     |                             | a           | -1030.18 | 158.72         | -6.49065  | 2.97704E-5 |
|          |     |                             | b           | -1497.39 | 167.51         | -8.93931  | 1.18581E-6 |

|          |     |                                                                                   |    |          |         |          |            |
|----------|-----|-----------------------------------------------------------------------------------|----|----------|---------|----------|------------|
| <b>1</b> | (2) |  | s  | -1194.61 | 768.84  | -1.55377 | 0.1462     |
|          |     |                                                                                   | d  | 272.98   | 239.33  | 1.1406   | 0.27629    |
|          |     |                                                                                   | a  | 1070.41  | 220.99  | 4.84373  | 4.02496E-4 |
|          |     |                                                                                   | b  | -144.50  | 233.23  | -0.61955 | 0.54714    |
| <b>2</b> | (2) |  | s  | -1716.74 | 1221.31 | -1.40565 | 0.18519    |
|          |     |                                                                                   | d  | -683.02  | 380.18  | -1.7966  | 0.0976     |
|          |     |                                                                                   | a  | -38.36   | 351.04  | -0.10928 | 0.91479    |
|          |     |                                                                                   | b  | -682.75  | 370.48  | -1.84288 | 0.09018    |
| <b>1</b> | (3) |  | di | -1025.23 | 748.26  | -1.37016 | 0.19573    |
|          |     |                                                                                   | e  | -184.15  | 228.73  | -0.8051  | 0.43642    |
|          |     |                                                                                   | a  | -199.88  | 136.61  | -1.46311 | 0.16913    |
|          |     |                                                                                   | b  | -1593.71 | 238.92  | -6.67051 | 2.29143E-5 |
| <b>2</b> | (3) |  | di | -1580.47 | 538.99  | -2.93228 | 0.01255    |
|          |     |                                                                                   | e  | -739.59  | 164.76  | -4.4889  | 7.40836E-4 |
|          |     |                                                                                   | a  | -529.44  | 98.41   | -5.38014 | 1.65318E-4 |
|          |     |                                                                                   | b  | -1379.67 | 172.10  | -8.01666 | 3.68066E-6 |
| <b>1</b> | (3) |  | di | -291.15  | 644.97  | -0.45143 | 0.65973    |
|          |     |                                                                                   | e  | 282.45   | 197.15  | 1.43265  | 0.17749    |
|          |     |                                                                                   | a  | 780.29   | 117.75  | 6.62635  | 2.44257E-5 |
|          |     |                                                                                   | b  | -398.43  | 205.94  | -1.9347  | 0.07695    |
| <b>2</b> | (3) |  | di | -1454.39 | 1373.31 | -1.05903 | 0.31044    |
|          |     |                                                                                   | e  | -397.69  | 419.80  | -0.94734 | 0.36215    |
|          |     |                                                                                   | a  | -26.41   | 250.73  | -0.10535 | 0.91784    |
|          |     |                                                                                   | b  | -1030.84 | 438.50  | -2.35083 | 0.03666    |

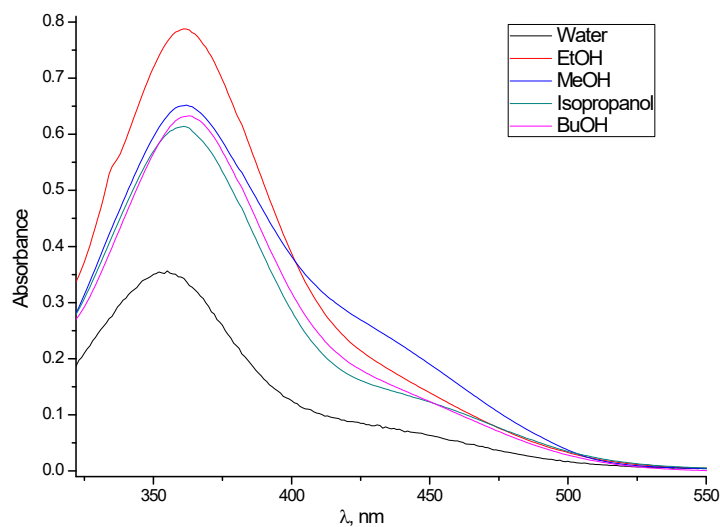

**Fig. S7.** UV-Vis spectra of **1** in neutral form (polar protic solvents).

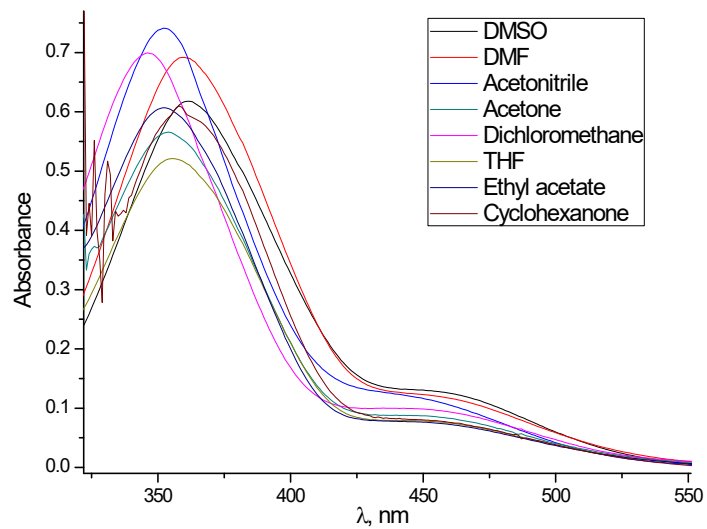

**Fig. S8.** UV-Vis spectra of **1** in neutral form (polar non-protic solvents).

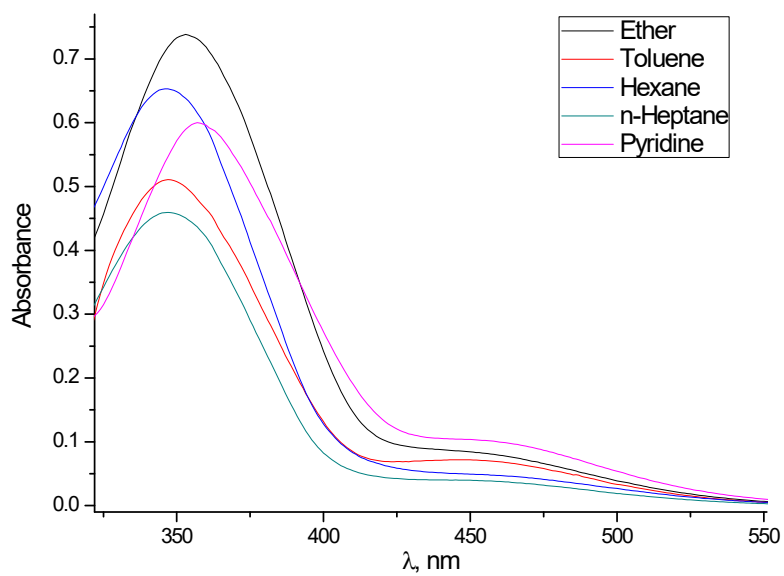

**Fig. S9.** UV-Vis spectra of **1** in neutral form (non-polar solvents).

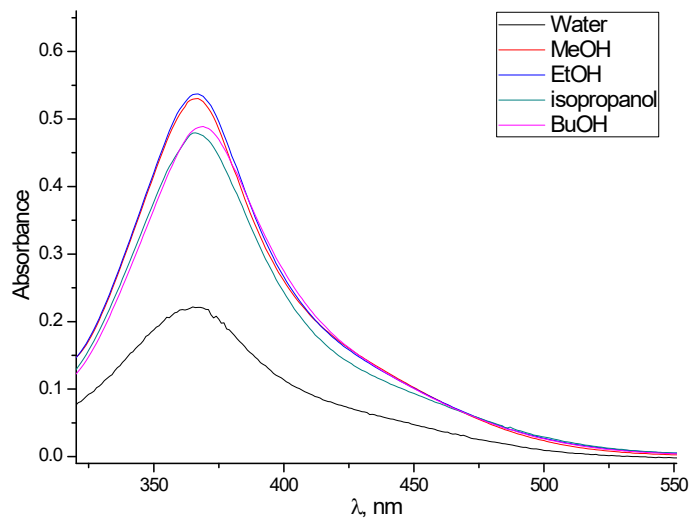

**Fig. S10.** UV-Vis spectra of **2** in neutral form (polar protic solvents).

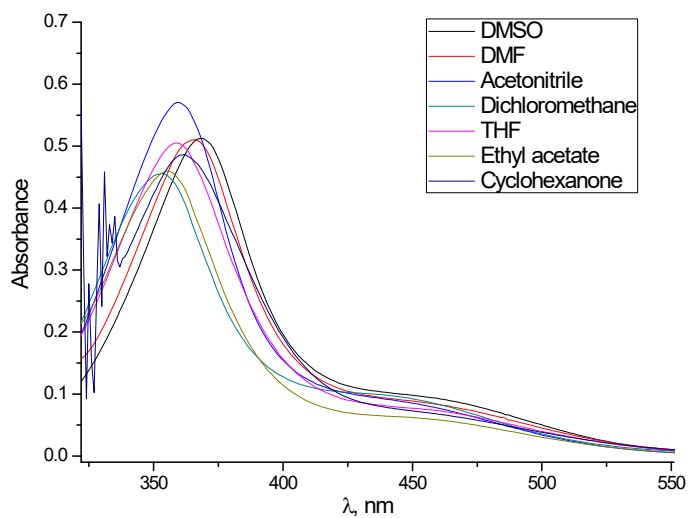

**Fig. S11.** UV-Vis spectra of **2** in neutral form (polar non-protic solvents).

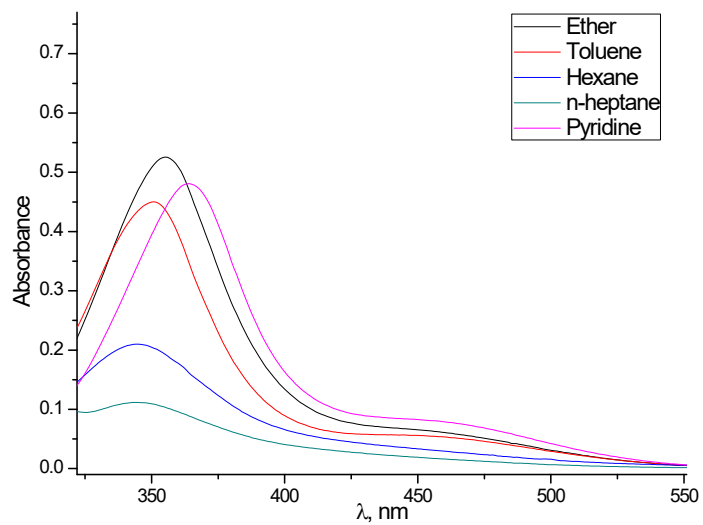

**Fig. S12.** UV-Vis spectra of **2** in neutral form (non-polar solvents).

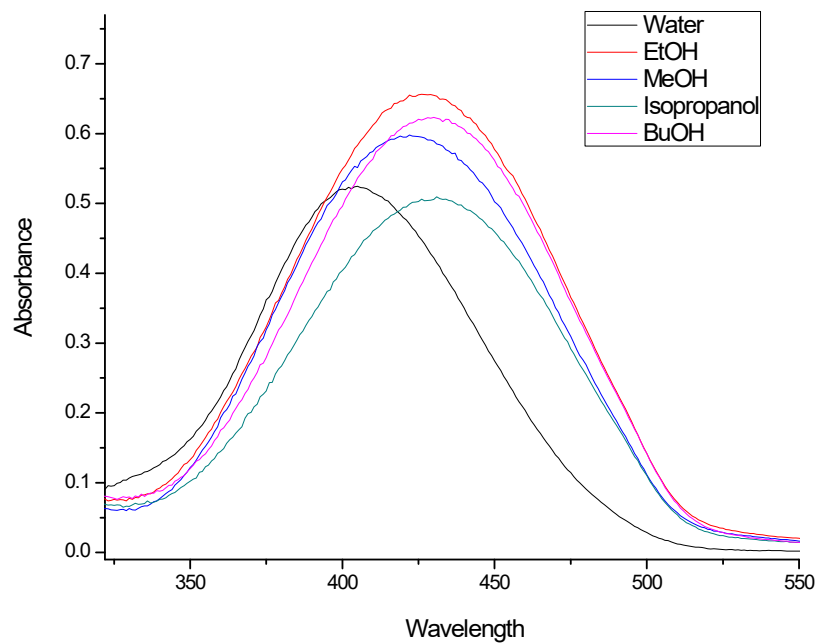

**Fig. S13.** UV-Vis spectra of **1** in protonated form (polar protic solvents).



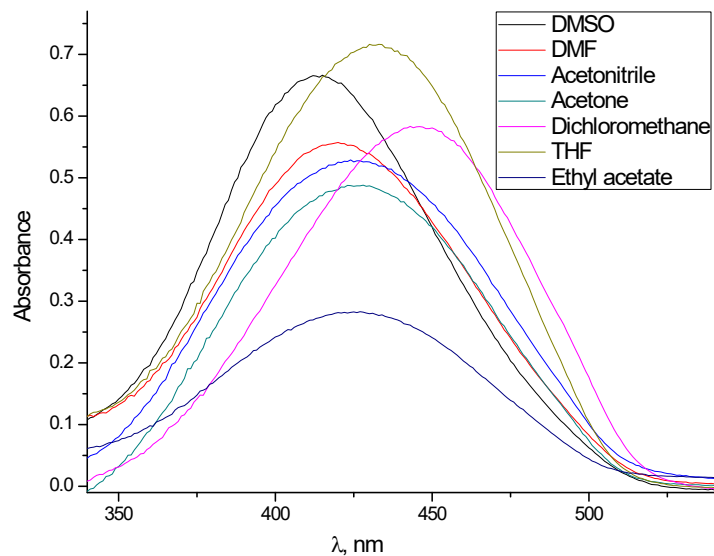

**Fig. S14.** UV-Vis spectra of **1** in protonated form (polar non-protic solvents).

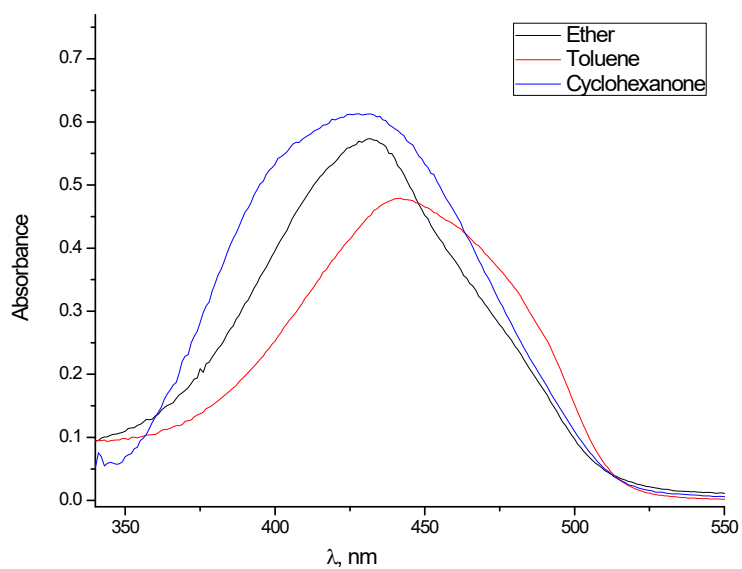

**Fig. S15.** UV-Vis spectra of **1** in protonated form (non- polar solvents).

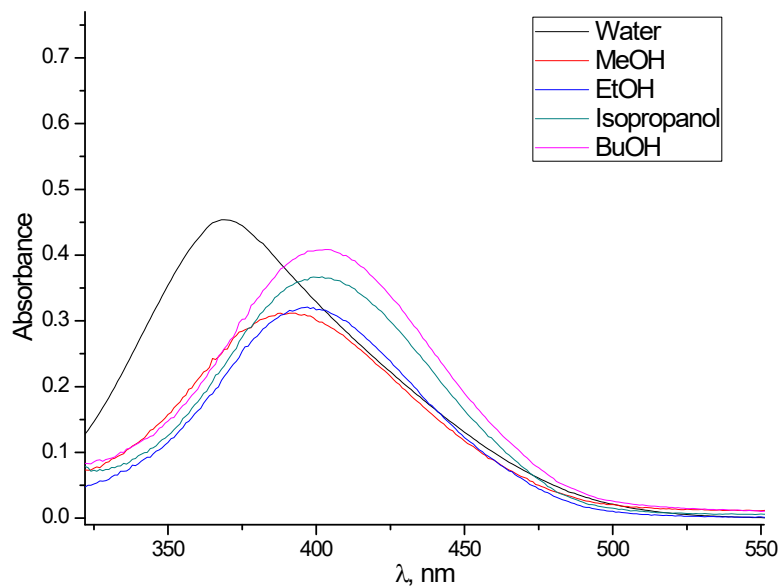

**Fig. S16.** UV-Vis spectra of **2** in protonated form (polar protic solvents).

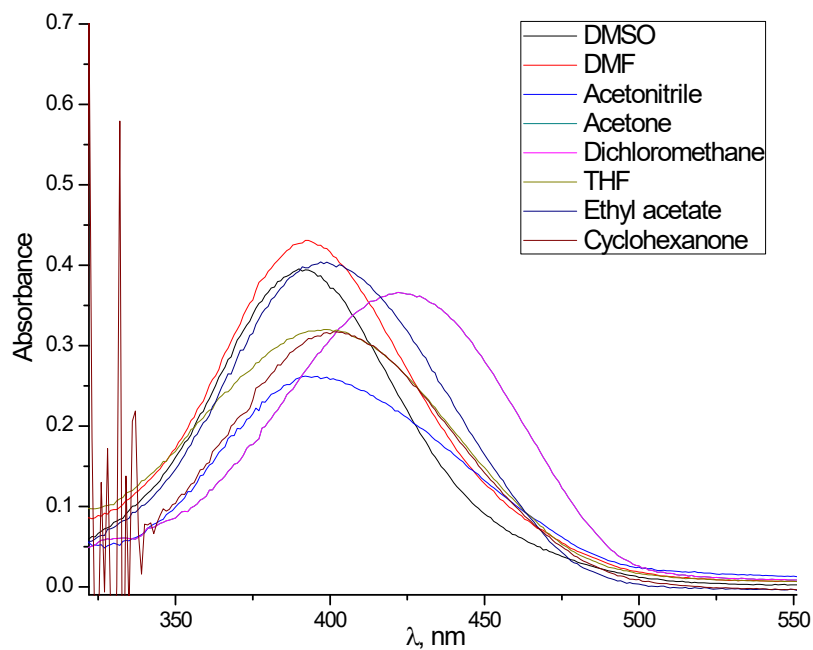

**Fig. S17.** UV-Vis spectra of **2** in protonated form (polar non-protic solvents).

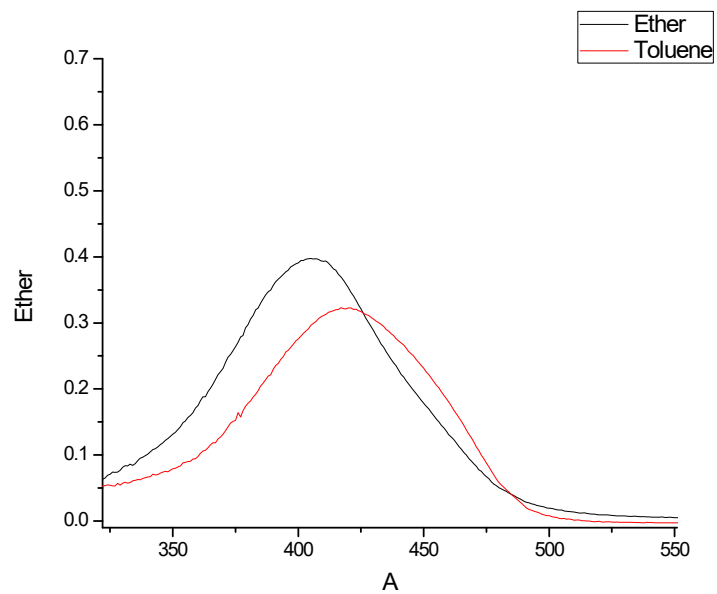

**Fig. S18.** UV-Vis spectra of **2** in protonated form (non- polar solvents).

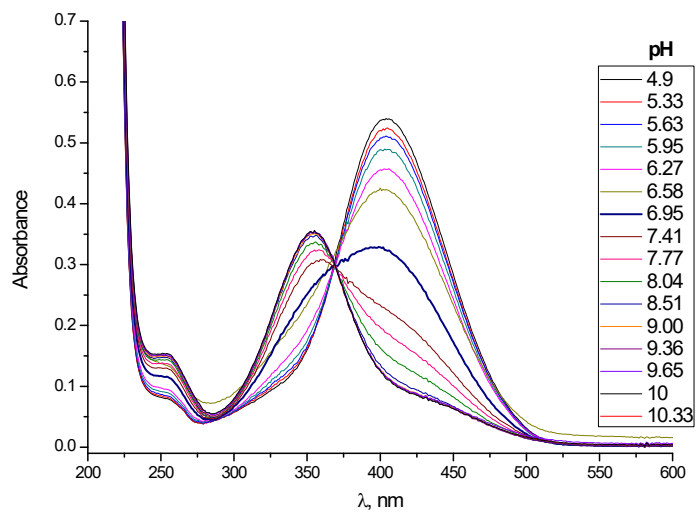

**Fig. S19.** Spectrophotometric pH-titration of **1** in H<sub>2</sub>O in a 0.02 M mixture of MES, MOPS and CHES buffers.

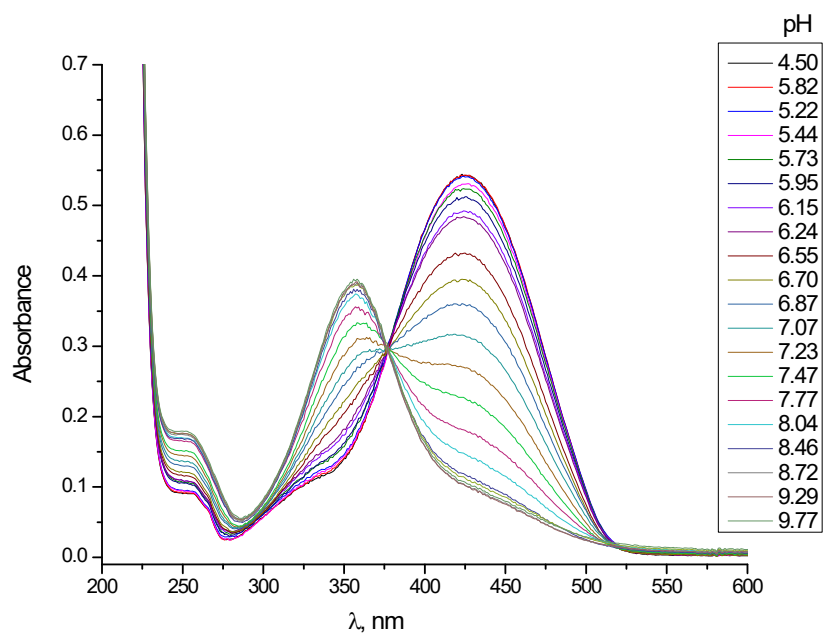

**S20.** Spectrophotometric pH-titration of **1** in H<sub>2</sub>O-EtOH 50/50 v/v in a 0.02 M mixture of MES, MOPS and CHES buffers

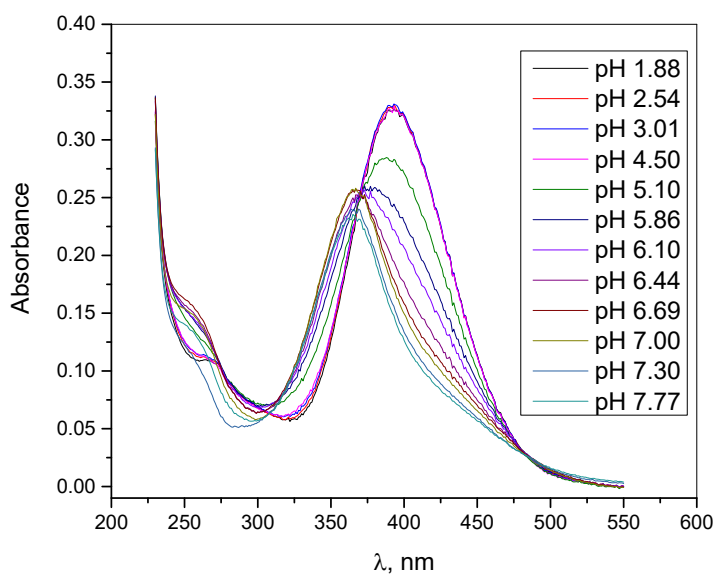

**Fig. S21.** Spectrophotometric pH-titration of **2** in H<sub>2</sub>O in a 0.02 M mixture of MES, MOPS and CHES buffers.

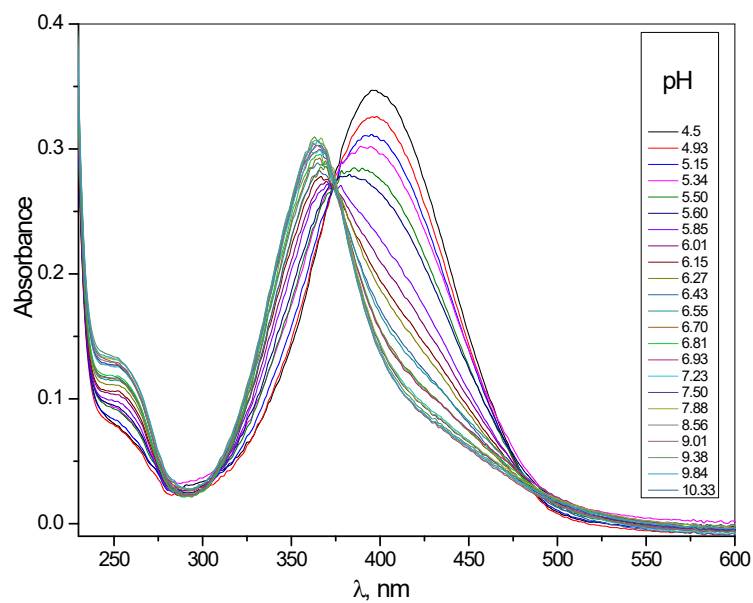

**Fig. S22.** Spectrophotometric pH-titration of **2** in H<sub>2</sub>O-EtOH 50/50 v/v in a 0.02 M mixture of MES, MOPS and CHES buffers

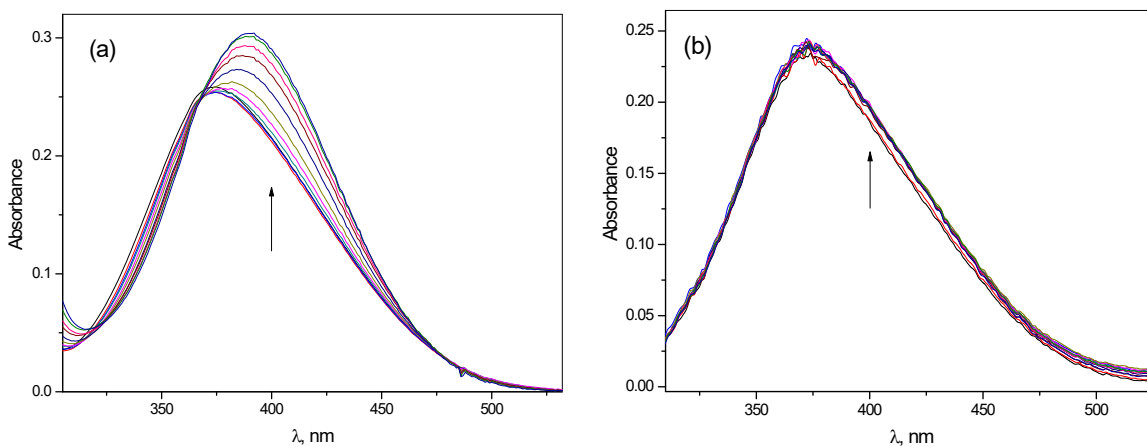

**Fig. S23.** Spectrophotometric titration of 25 mM **2** by 0 – 1 mM CuSO<sub>4</sub> (a) and 0 – 5 mM ZnSO<sub>4</sub> (b) at pH 6. Arrows show the direction of spectral changes induced by increased concentrations of the metal ion.

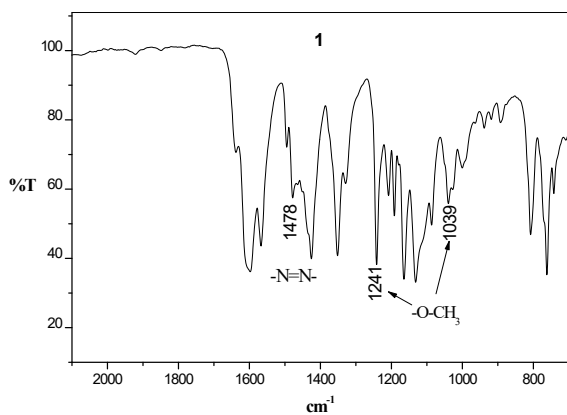

(a)

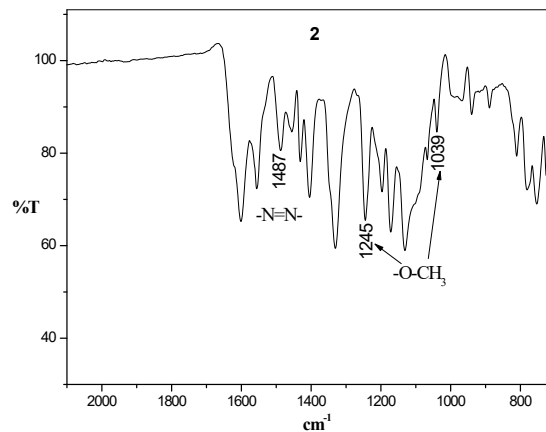

(b)

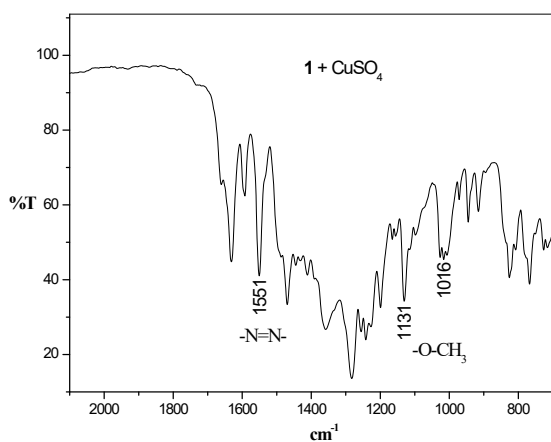

(c)

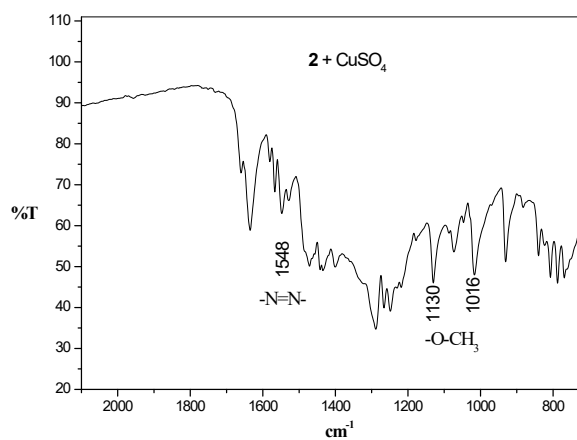

(d)

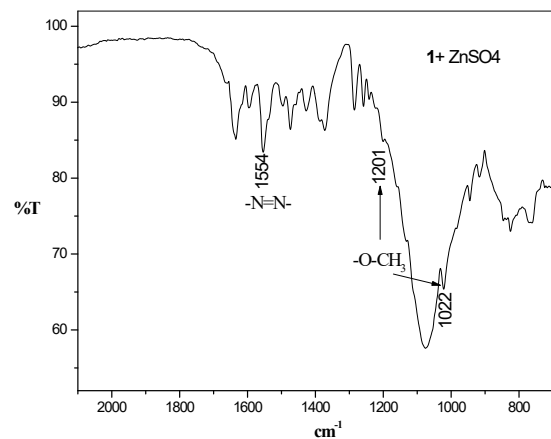

(e)

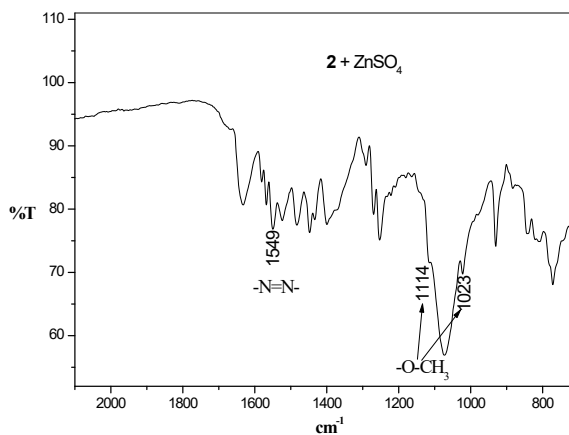

(f)

**Fig. S24.** FTIR spectra of free **1** (a) and **2** (b) and their complexes with Cu(II), (c) and (d): and Zn(II), (e) and (f), as solid powders. Metal complexes were prepared by mixing a

neutral ligand, **1** or **2**, with metal sulfate in methanol in the 1:1 molar ratio. Precipitated complexes were dried to remove rests of the solvent.

The characteristic bands of azo and methoxy groups were assigned considering established ranges of their absorption (P. Larkin, *Infrared and Raman Spectroscopy: Principles and Spectral Interpretation*, 2011, Elsevier) and reported results for other azobenzene derivatives (G.-Y. Yeap et al., *J. Mol. Struct.* 2008, **882**, 1–8; D. R. Armstrong, J. Clarkson, and W. E. Smith, *J. Phys. Chem.* 1995, **99**, 17825-17831; H. F. Babamale et al., *J. Mol. Struct.* 2021, **1232**, 130049).

The complexation with Cu(II) and Zn(II) shifts the band of the azo group to higher frequencies, which is unusual. However, similar shifts were recently reported for Cu(II) complexes of some *ortho*-hydroxy and *ortho*-amino azobenzenes (J. L. Pratihari et al., *Polyhedron*, 2019, **161**, 317–324; S. M. Emama, et al., *Int. J. Eng. Res. & Tech.*, 2017, **6**, 354-364) and probably are common for *ortho*-substituted azobenzenes in general.

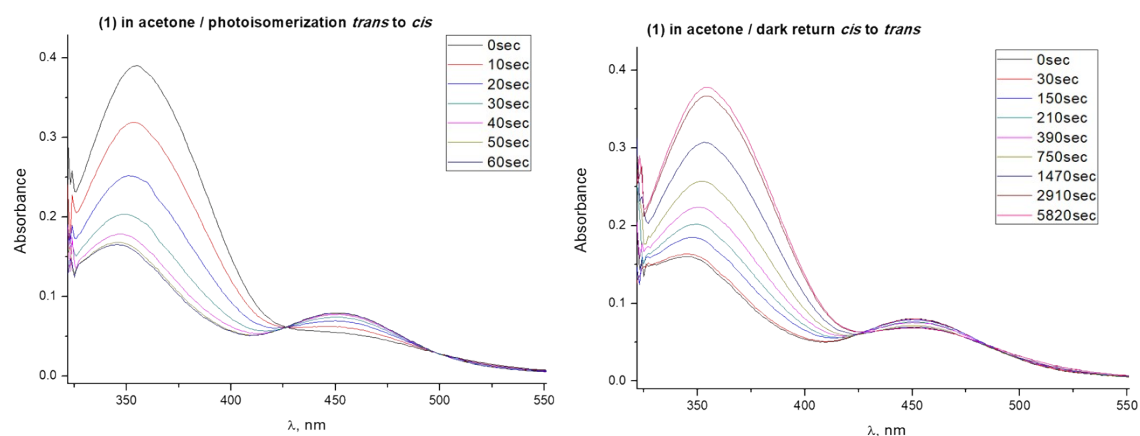

**Fig. S25.** UV-Vis spectra of photoisomerization of **1** in acetone at 360 nm.

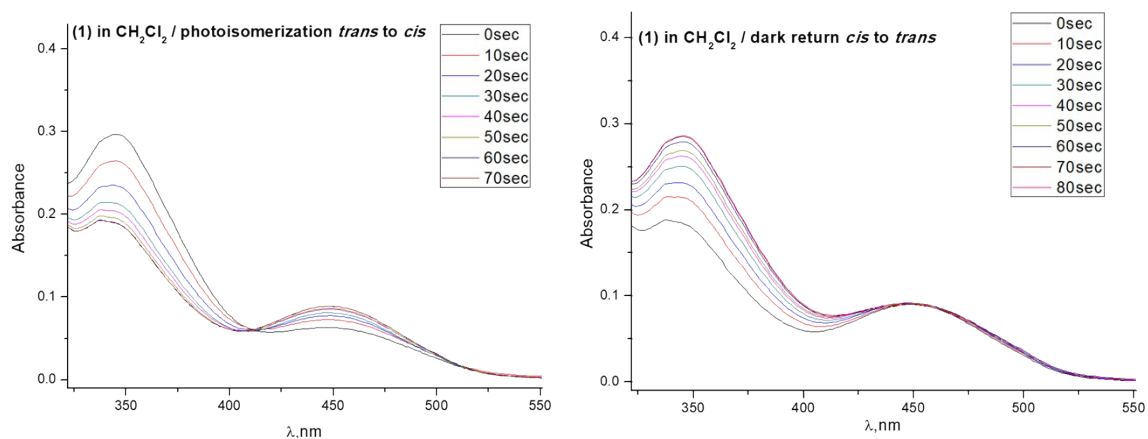

**Fig. S26.** UV-Vis spectra of photoisomerization of **1** in dichloromethane at 360 nm.

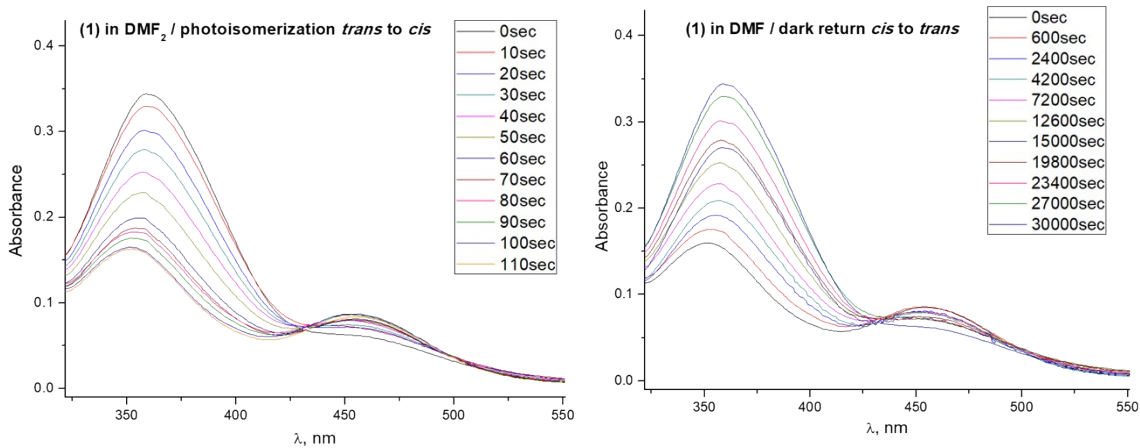

**Fig. S27.** UV-Vis spectra of photoisomerization of **1** in dimethylformamide at 360 nm.

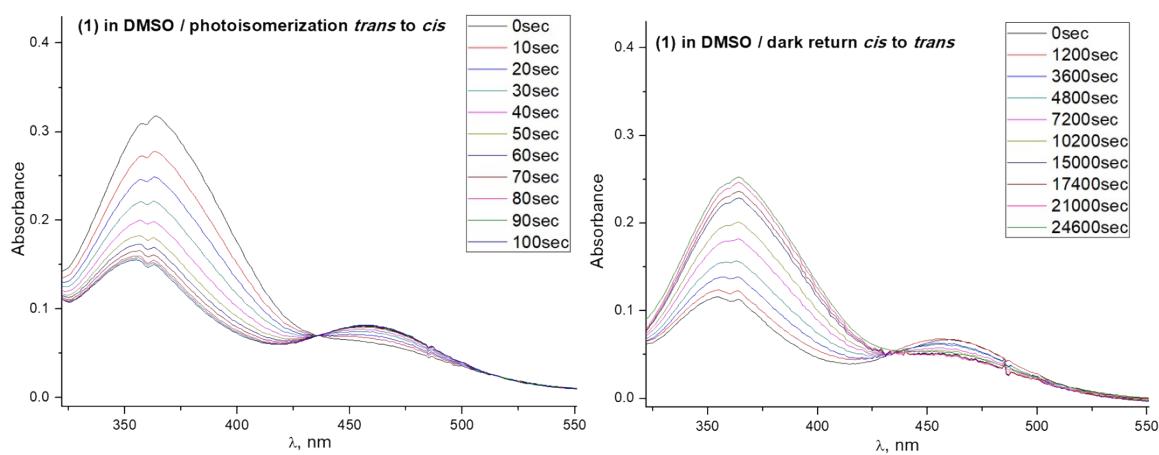

**Fig. S28** UV-Vis spectra of photoisomerization of **1** in dimethyl sulfoxide at 360 nm.

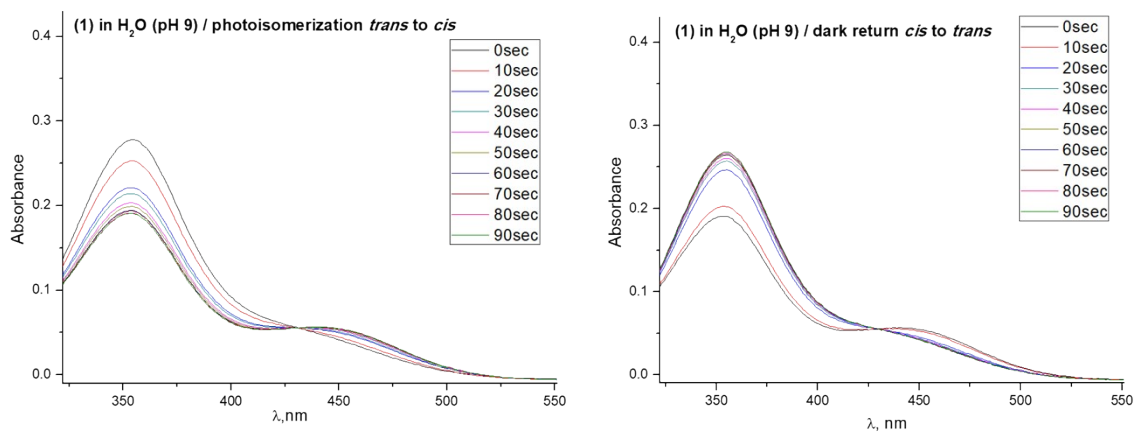

**Fig. S29.** UV-Vis spectra of photoisomerization of **1** in H<sub>2</sub>O (pH 9) at 360 nm.



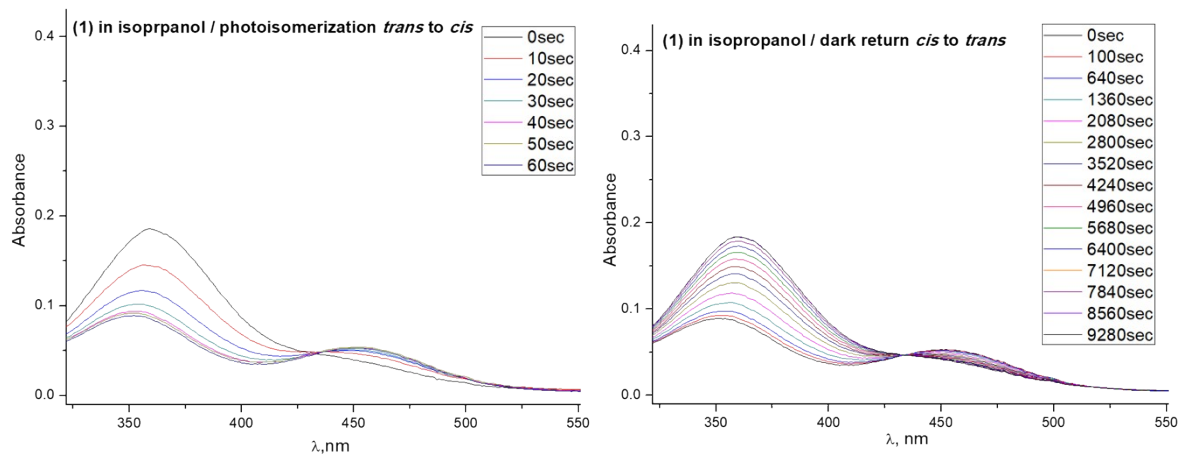

**Fig. S30.** UV-Vis spectra of photoisomerization of **1** in isopropanol at 360 nm.

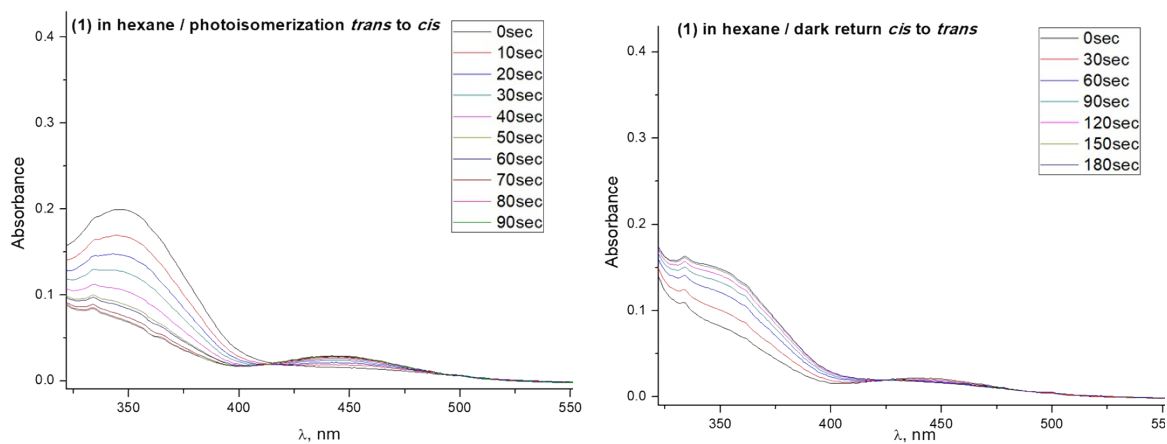

**Fig. S31.** UV-Vis spectra of photoisomerization of **1** in hexane at 360 nm.

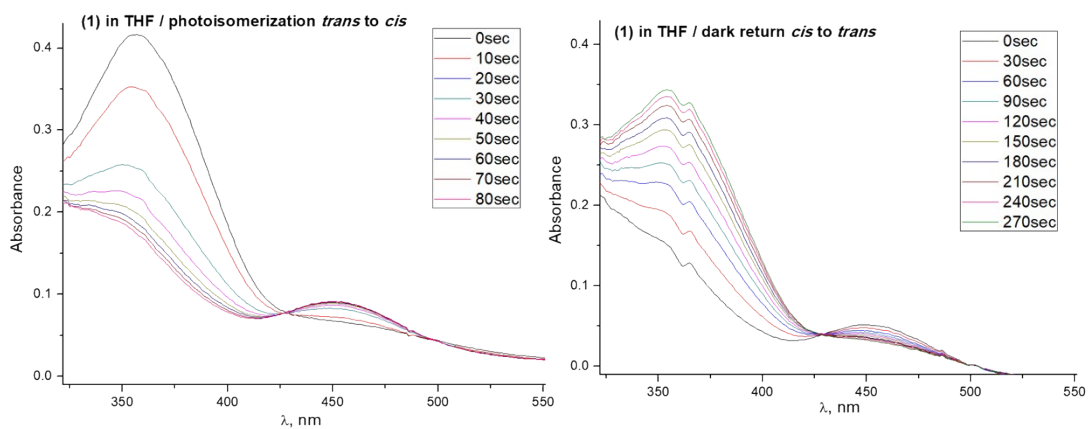

**Fig. S32.** UV-Vis spectra of photoisomerization of **1** in tetrahydrofuran at 360 nm.

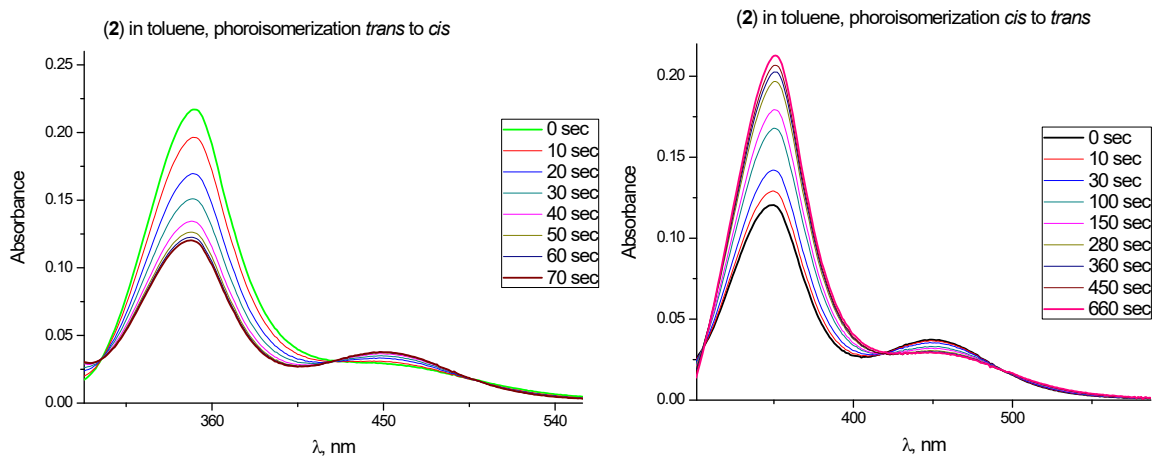

**Fig. S33.** UV-Vis spectra of photoisomerization of **2** in toluene at 360 nm.

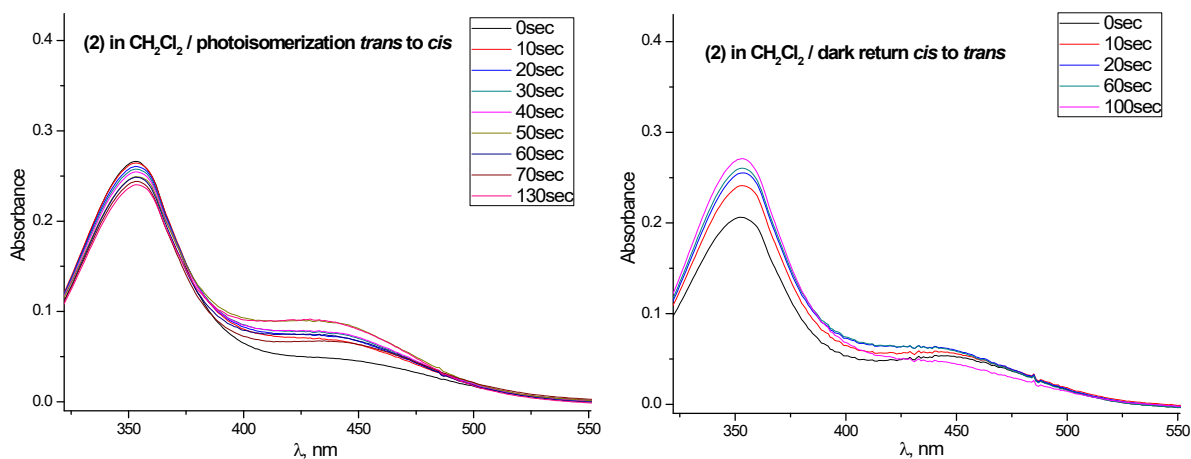

**Fig. S34.** UV-Vis spectra of photoisomerization of **2** in dichloromethane at 360 nm.

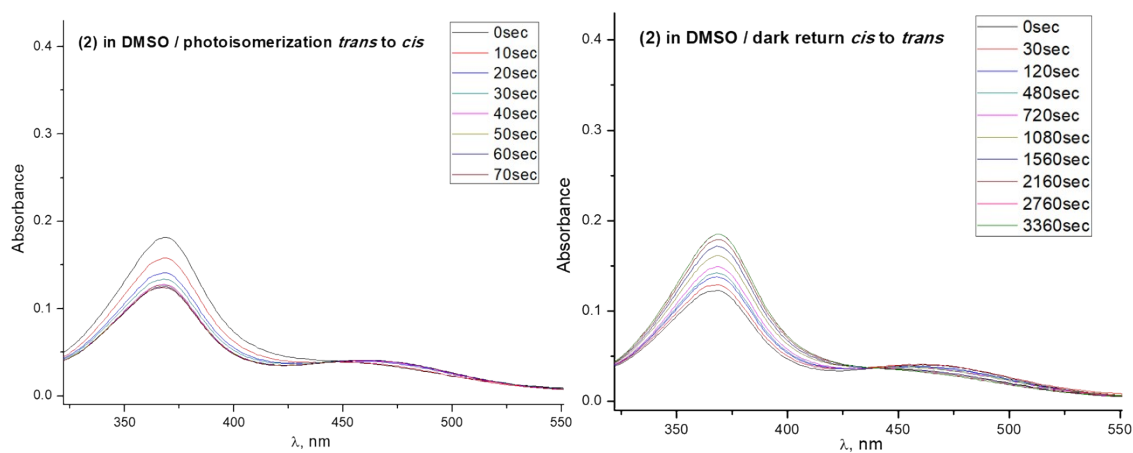

**Fig. S35.** UV-Vis spectra of photoisomerization of **2** in dimethyl sulfoxide at 360 nm.

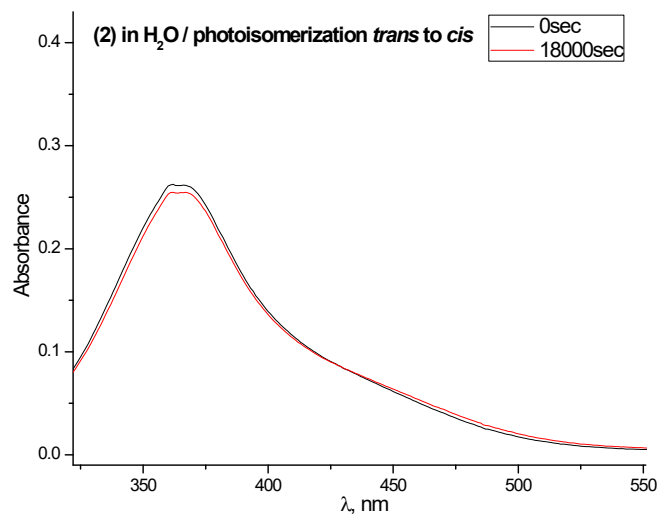

**Fig. S36.** UV-Vis spectra of photoisomerization of **2** in H<sub>2</sub>O (pH 9) at 360 nm.

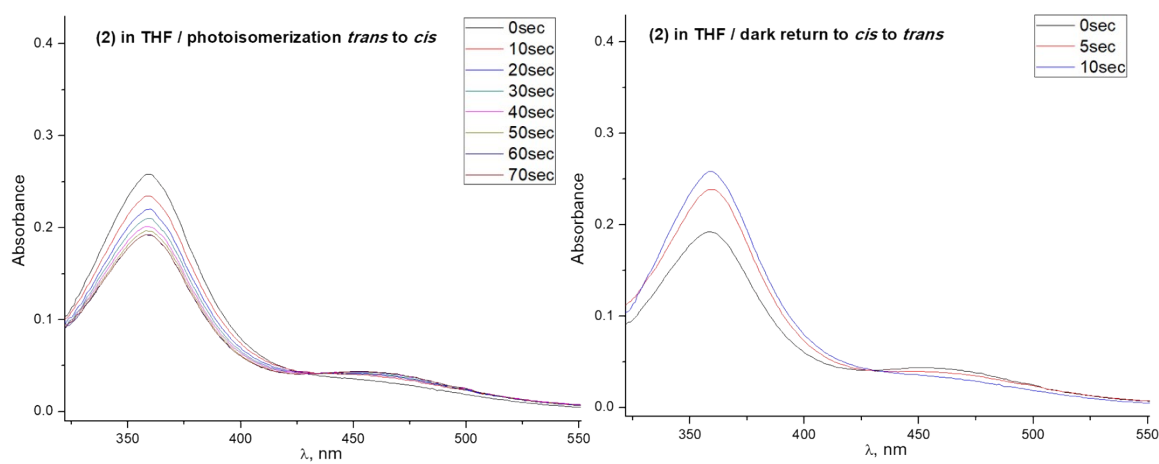

**Fig. S37.** UV-Vis spectra of photoisomerization of **2** in THF at 360 nm.
